# Supplementary material for: Impact of Lipid Composition and Receptor Conformation on the Spatio-temporal Organization of μ-Opioid Receptors in a Multi-component Plasma Membrane Model
Source: PubMed Central journal article supplement (PMC5154498; doi:10.1371/journal.pcbi.1005240), 2016-12-13
Supplement: pcbi.1005240.s001.pdf [file pcbi.1005240.s001.pdf]

| Residue            | Inactive    | Active      |
|--------------------|-------------|-------------|
| V94 (1.58)         | 0.17        | 0.12        |
| R95 (1.59)         | 0.15        | 0.10        |
| R182 (4.40)        | 0.14        | 0.10        |
| K185 (4.43)        | 0.13        | 0.11        |
| <b>I256 (5.62)</b> | <b>0.15</b> | <b>0.01</b> |
| L257 (5.63)        | 0.14        | 0.22        |
| <b>L259 (5.65)</b> | <b>0.10</b> | <b>0.00</b> |
| K260 (5.66)        | 0.20        | 0.25        |
| <b>S261 (5.67)</b> | <b>0.06</b> | <b>0.28</b> |
| <b>R276 (6.31)</b> | <b>0.04</b> | <b>0.16</b> |
| R280 (6.35)        | 0.24        | 0.23        |
| F338 (7.55)        | 0.16        | 0.13        |
| L339 (7.56)        | 0.22        | 0.18        |
| <b>K344 (H8)</b>   | <b>0.02</b> | <b>0.10</b> |
| <b>F347 (H8)</b>   | <b>0.02</b> | <b>0.11</b> |
| <b>R348 (H8)</b>   | <b>0.03</b> | <b>0.11</b> |
| <b>C351 (H8)</b>   | <b>0.03</b> | <b>0.10</b> |
