# Supplementary material for: Impact of Lipid Composition and Receptor Conformation on the Spatio-temporal Organization of μ-Opioid Receptors in a Multi-component Plasma Membrane Model
Source: PubMed Central journal article supplement (PMC5154498; doi:10.1371/journal.pcbi.1005240), 2016-12-13
Supplement: pcbi.1005240.s002.pdf [file pcbi.1005240.s002.pdf]

| Interface         | Inactive MOR/<br>Inactive MOR | Active MOR/<br>Active MOR | Inactive MOR/<br>Active MOR |
|-------------------|-------------------------------|---------------------------|-----------------------------|
| TM1,2,H8/TM1,2,H8 | 0.08 (0.07, 0.09)             | <b>0.26 (0.24, 0.27)</b>  | -                           |
| TM1,2,H8/TM4      | <b>0.31 (0.30, 0.33)</b>      | 0.09 (0.08, 0.09)         | -                           |
| TM1,2,H8/TM4,5    | <b>0.15 (0.14, 0.16)</b>      | -                         | -                           |
| TM1,2,H8/TM5      | 0.06 (0.05, 0.06)             | <b>0.23 (0.22, 0.25)</b>  | <b>0.61 (0.58,0.65)</b>     |
| TM1,2,H8/TM5,6    | -                             | <b>0.26 (0.24, 0.27)</b>  | -                           |
| TM1,8/TM4         | 0.08 (0.07, 0.09)             | -                         | -                           |
| TM1,H8/TM6,7      | 0.08 (0.07, 0.09)             | -                         | -                           |
| TM2,H8/TM4        | -                             | -                         | 0.39 (0.35,0.42)            |
| TM4/TM4           | -                             | 0.17 (0.16, 0.18)         | -                           |
| TM4/TM5           | 0.08 (0.07, 0.09)             | -                         | -                           |
| TM4/TM7           | 0.07 (0.07, 0.08)             | -                         | -                           |
| TM5/TM5           | 0.08 (0.07, 0.09)             | -                         | -                           |
