# Supplementary material for: Impact of Lipid Composition and Receptor Conformation on the Spatio-temporal Organization of μ-Opioid Receptors in a Multi-component Plasma Membrane Model
Source: PubMed Central journal article supplement (PMC5154498; doi:10.1371/journal.pcbi.1005240), 2016-12-13
Supplement: pcbi.1005240.s003.pdf [file pcbi.1005240.s003.pdf]

| TM1,2,H8/<br>TM4   | TM1,2,H8/<br>TM4,5 | TM1,2,H8/<br>TM1,2,H8 | TM1,2,H8/<br>TM5   | TM1,2,H8/<br>TM5,6 |
|--------------------|--------------------|-----------------------|--------------------|--------------------|
| L116 (2.52)        | A73 (1.37)         | A73 (1.37)            | M72 (1.36)         | <b>A73 (1.37)</b>  |
| <b>S119 (2.55)</b> | L74 (1.38)         | L74 (1.38)            | A73 (1.37)         | <b>S76 (1.40)</b>  |
| <b>T120 (2.56)</b> | S76 (1.40)         | S76 (1.40)            | L74 (1.38)         | <b>I77 (1.41)</b>  |
| V187 (4.45)        | I77 (1.41)         | <b>I77 (1.41)</b>     | S76 (1.40)         | C79 (1.43)         |
| V202 (4.60)        | L116 (2.52)        | C79 (1.43)            | I77 (1.41)         | V80 (1.44)         |
|                    | S119 (2.55)        | V80 (1.44)            | L116 (2.52)        | V81 (1.45)         |
|                    | T120 (2.56)        | V81 (1.45)            | <b>S119 (2.55)</b> | L116 (2.52)        |
|                    | S196 (4.54)        | L83 (1.47)            | <b>T120 (2.56)</b> | <b>S119 (2.55)</b> |
|                    | A197 (4.55)        | N109 (2.45)           | F123 (2.59)        | <b>P122 (2.58)</b> |
|                    | I238 (5.44)        | L112 (2.48)           | C235 (5.41)        | I238 (5.44)        |
|                    | F239 (5.45)        | A113 (2.49)           | <b>I238 (5.44)</b> | F241 (5.47)        |
|                    | F241 (5.47)        | <b>L116 (2.52)</b>    | <b>F239 (5.45)</b> | <b>I242 (5.48)</b> |
|                    | <b>I242 (5.48)</b> | <b>S119 (2.55)</b>    | F241 (5.47)        | M243 (5.49)        |
|                    | M243 (5.49)        | T120 (2.56)           | <b>I242 (5.48)</b> | V245 (5.51)        |
|                    | V245 (5.51)        | <b>P122 (2.58)</b>    | M243 (5.49)        | R280 (6.35)        |
|                    | L246 (5.52)        |                       | V245 (5.51)        | L283 (6.38)        |
|                    | I256 (5.62)        |                       | L257 (5.63)        | V284 (6.39)        |
|                    | L257 (5.63)        |                       |                    | I290 (6.45)        |
|                    |                    |                       |                    | <b>T294 (6.49)</b> |
