# Supplementary material for: Impact of Lipid Composition and Receptor Conformation on the Spatio-temporal Organization of μ-Opioid Receptors in a Multi-component Plasma Membrane Model
Source: PubMed Central journal article supplement (PMC5154498; doi:10.1371/journal.pcbi.1005240), 2016-12-13
Supplement: pcbi.1005240.s005.pdf [file pcbi.1005240.s005.pdf]

A) PA

Inactive MOR

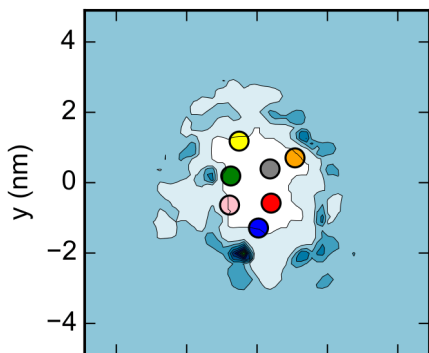

Active MOR

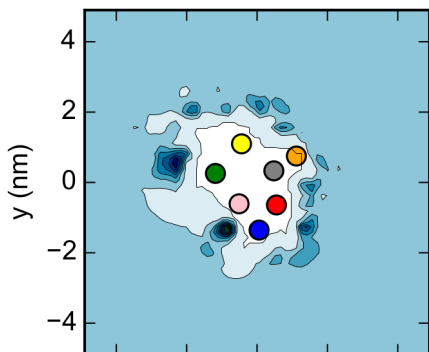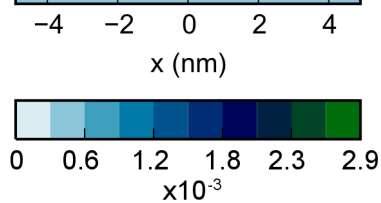

B) PI

Inactive MOR

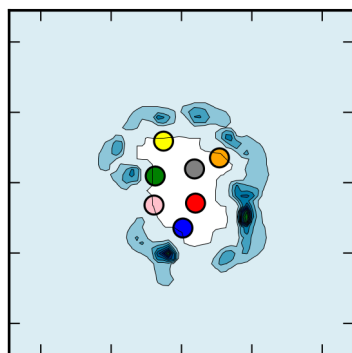

Active MOR

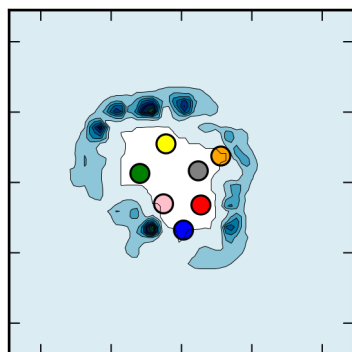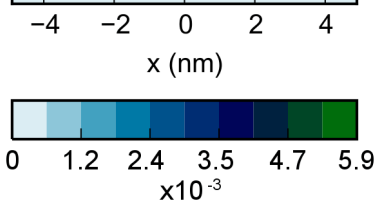C) PIP<sub>1-3</sub>

Inactive MOR

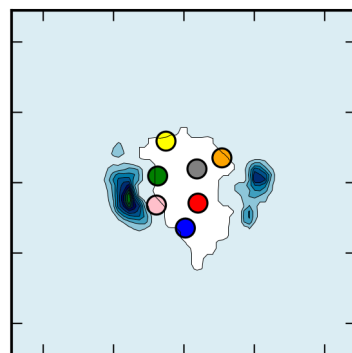

Active MOR

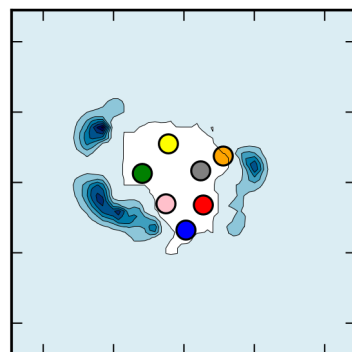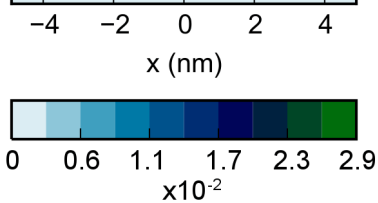

D) PS

Inactive MOR

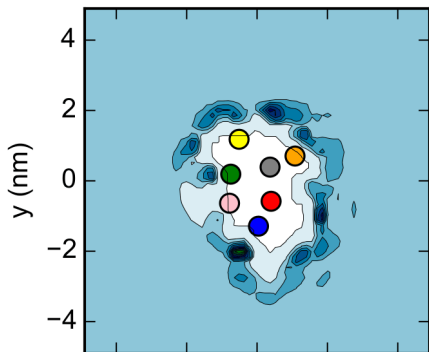

Active MOR

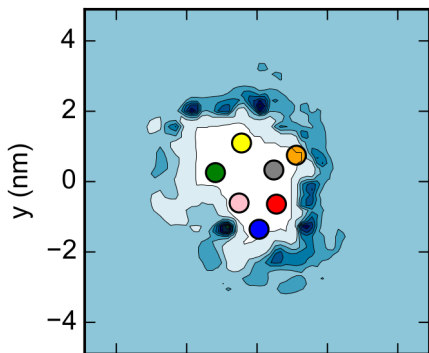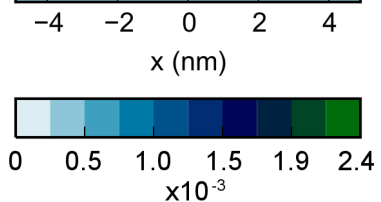

E) GM

Inactive MOR

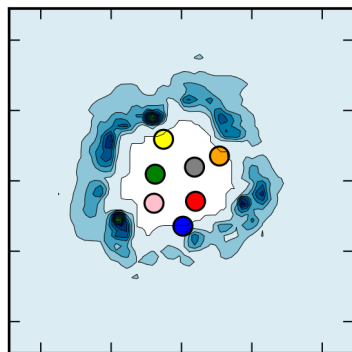

Active MOR

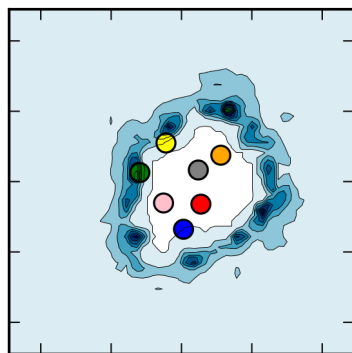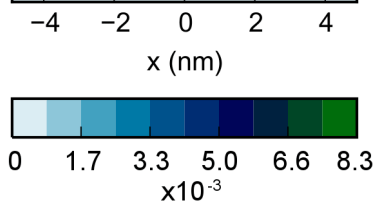

TM1

TM2

TM3

TM4

TM5

TM6

TM7
