# Supplementary material for: Impact of Lipid Composition and Receptor Conformation on the Spatio-temporal Organization of μ-Opioid Receptors in a Multi-component Plasma Membrane Model
Source: PubMed Central journal article supplement (PMC5154498; doi:10.1371/journal.pcbi.1005240), 2016-12-13

### Upper Leaflet

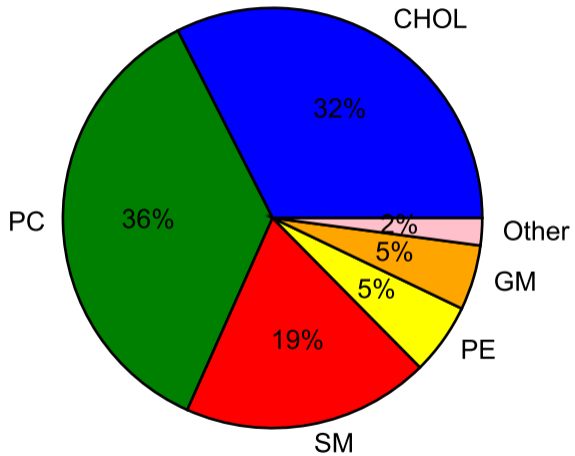

### Lower Leaflet

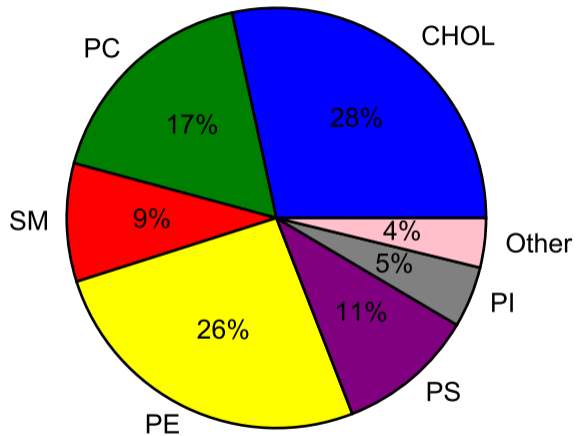

Supplement: pcbi.1005240.s006.pdf [file pcbi.1005240.s006.pdf]
