# Supplementary material for: Impact of Lipid Composition and Receptor Conformation on the Spatio-temporal Organization of μ-Opioid Receptors in a Multi-component Plasma Membrane Model
Source: PubMed Central journal article supplement (PMC5154498; doi:10.1371/journal.pcbi.1005240), 2016-12-13

Lipid Order in Inactive MOR

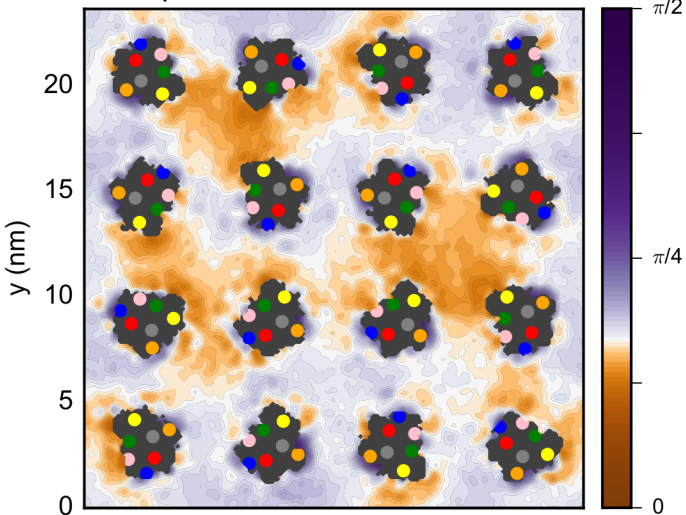

Bilayer Thickness in Inactive MOR

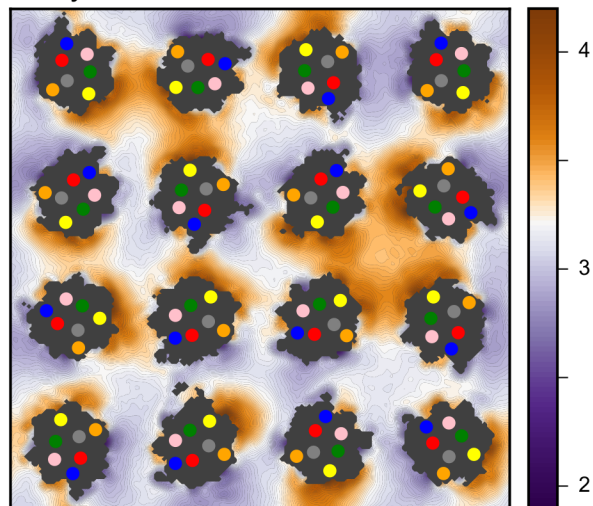

Lipid Order in Active MOR

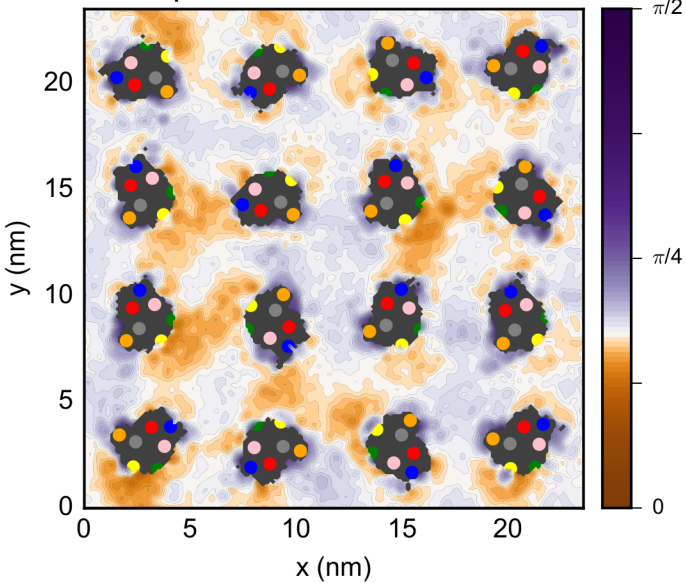

Bilayer Thickness in Active MOR

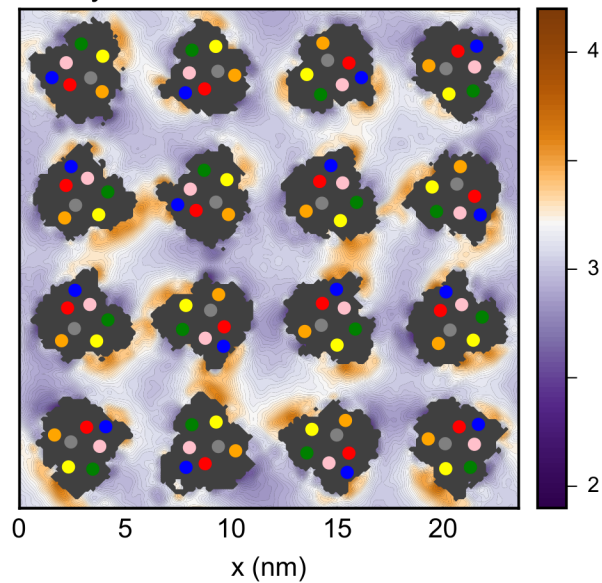

Supplement: pcbi.1005240.s007.pdf [file pcbi.1005240.s007.pdf]
